# Supplementary material for: Which glaucoma patients should be monitored at home and exploration of clinician perceptions on home monitoring? a survey of glaucoma specialists in the UK
Source: PubMed Central journal article supplement (PMC11574396; doi:10.1136/bmjopen-2023-080873), 2024-11-18

**Supplementary Figure 1: Summary Graph of Participant Responses (n=49)**

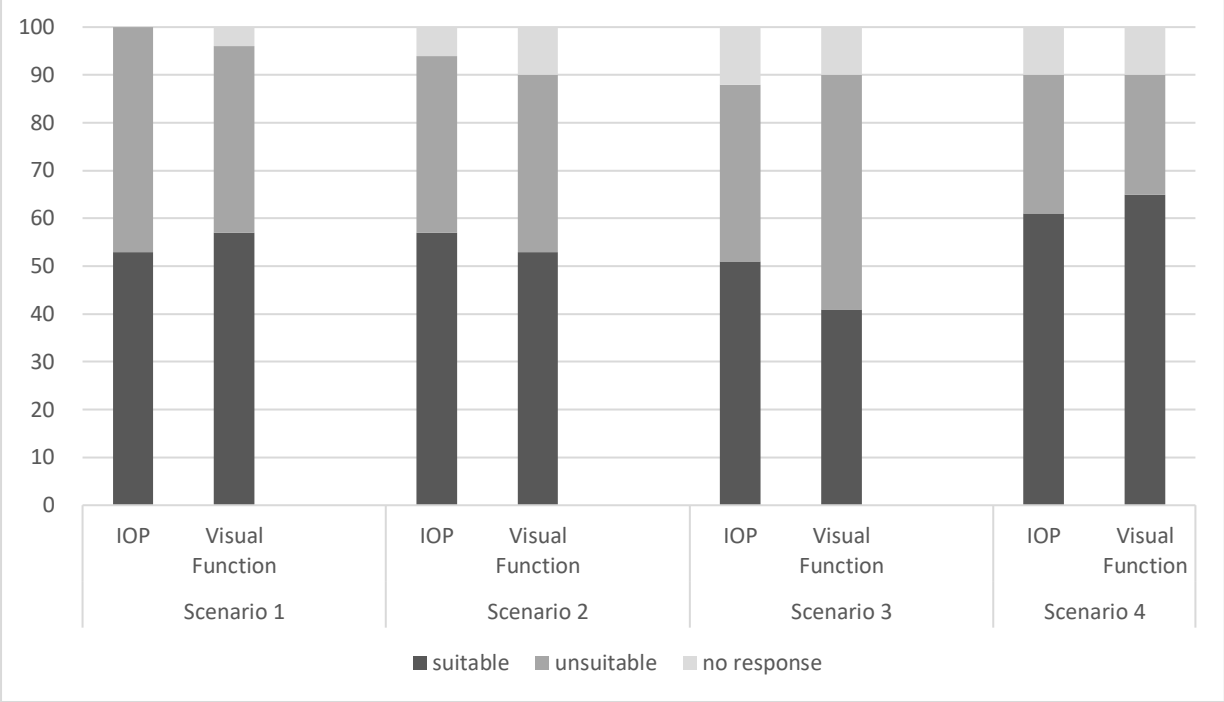

Supplement: bmjopen-14-11-s001.pdf [file bmjopen-14-11-s001.pdf]
